# Supplementary material for: Dependence of Long-Term Dynamics of Zooplankton in the Ob River on Interannual Changes in Hydrological and Hydrochemical Parameters
Source: MDPI journal article supplement (doi:10.3390/w13141910), 2021-07-09
Supplement: s1 [file s1]

# Dependence of Long-Term Dynamics of Zooplankton in the Ob River on Interannual Changes in Hydrological and Hydrochemical Parameters

Nadezhda Yermolaeva, Serafima Dvurechenskaya, Vladimir Kirillov and Aleksandr Puzanov

## Supplementary Material

**Table S1.** Species composition of zooplankton in the Ob River according to surveys of 1994-2009.

| Species of zooplankton                                                                                | 1994 | 1996 | 1999 | 2001 | 2002 | 2009 |
|-------------------------------------------------------------------------------------------------------|------|------|------|------|------|------|
| <b>Copepoda</b>                                                                                       |      |      |      |      |      |      |
| <i>Acanthocyclops vernalis vernalis</i> (Fischer, 1853)                                               | -    | -    | -    | +    | -    | +    |
| <i>Cyclops kolensis kolensis</i> Lilljeborg, 1901                                                     | -    | -    | -    | -    | -    | +    |
| <i>Cyclops furcifer</i> Claus, 1857 *                                                                 | -    | -    | -    | -    | +    | +    |
| <i>Cyclops scutifer scutifer</i> Sars G.O., 1863                                                      | -    | -    | -    | -    | -    | +    |
| <i>Cyclops strenuus strenuus</i> Fischer, 1851                                                        | +    | +    | +    | +    | +    | +    |
| <i>Cyclops vicinus vicinus</i> Uljanin, 1875                                                          | +    | +    | +    | +    | -    | +    |
| <i>Diacyclops bicuspidatus</i> (Claus, 1857)                                                          | -    | -    | -    | -    | -    | +    |
| <i>Ectocyclops phaleratus</i> (Koch, 1838)                                                            | -    | -    | -    | -    | -    | +    |
| <i>Eucyclops macruroides</i> (Lilljeborg, 1901)                                                       | -    | -    | -    | -    | -    | +    |
| <i>Eucyclops macrurus</i> (Sars G.O., 1863)                                                           | -    | -    | -    | -    | -    | +    |
| <i>Eucyclops serrulatus</i> (Fischer, 1851)                                                           | -    | +    | +    | +    | +    | +    |
| <i>Macrocyclus albidus</i> (Jurine, 1820)                                                             | -    | -    | -    | -    | -    | +    |
| <i>Macrocyclus fuscus</i> (Jurine, 1820)                                                              | -    | -    | -    | -    | -    | +    |
| <i>Megacyclus gigas</i> (Claus, 1857)                                                                 | -    | -    | -    | -    | -    | +    |
| <i>Megacyclus viridis</i> (Jurine, 1820)                                                              | +    | +    | +    | +    | +    | +    |
| <i>Thermocyclops crassus</i> (Fischer, 1853)                                                          | -    | +    | +    | -    | -    | +    |
| <i>Mesocyclops leuckarti</i> (Claus, 1857)                                                            | +    | +    | +    | +    | +    | +    |
| <i>Thermocyclops oithonoides</i> (Sars G.O., 1863)                                                    | -    | -    | +    | -    | +    | +    |
| <i>Paracyclops fimbriatus</i> (Fischer, 1853)                                                         | -    | -    | +    | +    | -    | +    |
| <i>Eudiaptomus transylvanicus</i> (Daday, 1890) = <i>Eudiaptomus coeruleus vulgaris</i> (Rylov, 1930) | -    | -    | -    | -    | -    | +    |
| <i>Eudiaptomus gracilis</i> (Sars G.O., 1863)                                                         | -    | -    | +    | +    | -    | +    |
| <i>Eudiaptomus graciloides</i> Lilljeborg, 1888                                                       | +    | +    | +    | +    | +    | +    |
| <i>Nitocra hibernica hibernica</i> (Brady, 1880)                                                      | -    | -    | -    | -    | -    | +    |
| <i>Eurytemora affinis</i> (Poppe, 1880)                                                               | -    | -    | -    | -    | -    | +    |
| <b>Cladocera</b>                                                                                      |      |      |      |      |      |      |
| <i>Acroperus harpae</i> (Baird, 1834)                                                                 | -    | -    | -    | -    | -    | +    |
| <i>Alona guttata</i> Sars, 1862                                                                       | -    | -    | -    | -    | -    | +    |
| <i>Alona quadrangularis</i> (O. F. Müller, 1785)                                                      | -    | +    | -    | +    | +    | +    |
| <i>Alona (Coronatella) rectangula</i> (G.O. Sars, 1862)                                               | +    | -    | +    | -    | -    | -    |
| <i>Alonella excisa</i> (Fischer, 1854)                                                                | +    | -    | +    | -    | -    | +    |
| <i>Alonella nana</i> (Baird, 1850)                                                                    | -    | -    | -    | -    | -    | +    |
| <i>Biapertura (Alona) affinis</i> (Leydig, 1860)                                                      | +    | +    | -    | +    | +    | +    |
| <i>Bosmina longirostris</i> (O. F. Müller, 1785)                                                      | +    | +    | +    | +    | +    | +    |
| <i>Bosmina (Eubosmina) coregoni</i> Baird, 1857                                                       | -    | -    | +    | +    | -    | -    |
| <i>Bosminopsis deitersi</i> Richard, 1897                                                             | -    | -    | -    | -    | -    | +    |

|                                                                          |   |   |   |   |   |   |
|--------------------------------------------------------------------------|---|---|---|---|---|---|
| <i>Camptocercus rectirostris</i> Schödler, 1862                          | - | - | - | - | - | + |
| <i>Ceriodaphnia quadrangula</i> (O. F. Müller, 1785)                     | + | - | - | - | + | + |
| <i>Chydorus ovalis</i> Kurz, 1874                                        | - | - | - | - | + | + |
| <i>Chydorus sphaericus</i> (O. F. Müller, 1776)                          | + | + | + | + | + | + |
| <i>Daphnia</i> ( <i>Daphnia</i> ) <i>cucullata</i> G.O. Sars, 1862       | + | + | + | + | + | - |
| <i>Daphnia cristata</i> G.O. Sars, 1862                                  | - | - | - | - | - | + |
| <i>Daphnia</i> ( <i>Daphnia</i> ) <i>longispina</i> (O. F. Müller, 1776) | + | + | + | + | - | + |
| <i>Daphnia</i> ( <i>Daphnia</i> ) <i>pulex</i> Leydig, 1860              | - | - | - | - | + | + |
| <i>Diaphanosoma brachyurum</i> (Liévin, 1848)                            | - | + | + | + | - | + |
| <i>Disparalona rostrata</i> (Koch, 1841)                                 | - | - | - | - | + | + |
| <i>Graptoleberis testudinaria</i> (Fischer, 1851)                        | - | - | - | + | - | - |
| <i>Ilyocryptus acutifrons</i> G.O. Sars, 1862                            | - | - | - | - | - | + |
| <i>Ilyocryptus sordidus</i> (Liévin, 1848)                               | - | - | - | - | - | + |
| <i>Leptodora kindti</i> (Focke, 1844)                                    | - | - | - | - | - | + |
| <i>Macrothrix hirsuticornis</i> Norman & Brady, 1867                     | - | - | - | - | - | + |
| <i>Macrothrix laticornis</i> (Jurine, 1820)                              | + | - | - | - | - | + |
| <i>Moina brachiata</i> (Jurine, 1820)                                    | - | - | - | - | - | + |
| <i>Moina macrocopa</i> (Straus, 1820)                                    | + | + | - | - | - | - |
| <i>Monospilus dispar</i> G.O. Sars, 1862                                 | - | - | - | - | - | + |
| <i>Oxyurella tenuicaudis</i> (G.O. Sars, 1862)                           | - | - | - | - | - | + |
| <i>Peracantha truncata</i> (O. F. Müller, 1785)                          | - | - | + | + | - | + |
| <i>Pleuroxus aduncus</i> (Jurine, 1820)                                  | - | - | - | - | - | + |
| <i>Picripleuroxus laevis</i> (G.O. Sars, 1862)                           | - | - | - | - | - | + |
| <i>Picripleuroxus striatus</i> (Schödler, 1862)                          | - | - | - | - | + | + |
| <i>Pleuroxus uncinatus</i> (Baird, 1850)                                 | - | - | - | + | - | + |
| <i>Pseudochydorus globosus</i> (Baird, 1843)                             | - | - | - | - | - | + |
| <i>Scapholeberis mucronata</i> (O. F. Müller, 1776)                      | - | - | - | - | - | + |
| <i>Simocephalus vetulus</i> (O. F. Müller, 1776)                         | - | - | - | + | - | - |
| <i>Sida crystallina</i> (O. F. Müller, 1776)                             | - | - | - | + | - | + |
| <i>Tretocephala ambigua</i> (Lilljeborg, 1900)                           | - | - | - | + | - | + |
| <b>Phylum: Rotifera Cuvier, 1817</b>                                     |   |   |   |   |   |   |
| <i>Asplanchna herricki</i> de Guerne, 1888                               | - | - | - | - | - | + |
| <i>Asplanchna priodonta</i> Gosse, 1850                                  | + | + | + | + | + | + |
| <i>Brachionus angularis</i> Gosse, 1851                                  | + | + | + | + | + | + |
| <i>Brachionus angularis bidens</i> Plate, 1886                           | - | - | - | - | - | + |
| <i>Brachionus bennini</i> Leissling, 1924                                | - | - | - | + | - | - |
| <i>Brachionus calyciflorus</i> Pallas, 1766                              | + | + | + | + | + | + |
| <i>Brachionus diversicornis</i> (Daday, 1883)                            | - | + | + | + | + | + |
| <i>Brachionus quadridentatus</i> Hermann, 1783                           | + | + | + | + | - | + |
| <i>Brachionus leydigii</i> Cohn, 1862                                    | - | - | - | - | + | - |
| <i>Brachionus variabilis</i> Hempel, 1896                                | - | - | - | - | + | - |
| <i>Cephalodella gibba</i> (Ehrenberg, 1832)                              | - | - | - | - | - | + |
| <i>Cephalodella catellina</i> (Müller, 1786)                             | - | - | - | - | - | + |
| <i>Conochilus unicornis</i> Rousselet, 1892                              | - | - | - | - | - | + |
| <i>Euchlanis deflexa</i> Gosse, 1851                                     | - | - | - | - | - | + |
| <i>Euchlanis dilatata</i> Ehrenberg, 1832                                | - | - | + | + | + | + |
| <i>Euchlanis lyra</i> Hudson, 1886                                       | - | - | - | - | - | + |
| <i>Encentrum elongatum</i> Wiszniewski, 1932                             | - | - | - | - | - | + |
| <i>Filinia longiseta</i> (Ehrenberg, 1834)                               | + | + | + | + | + | + |
| <i>Filinia terminalis</i> (Plate, 1886)                                  | - | - | - | - | - | + |
| <i>Filinia terminalis maior</i> Colditz, 1924                            | - | - | - | - | - | + |

|                                                                     |   |   |   |   |   |   |
|---------------------------------------------------------------------|---|---|---|---|---|---|
| <i>Gastropus minor</i> (Rousselet, 1892)                            | - | - | - | - | - | + |
| <i>Hexarthra mira</i> (Hudson, 1871)                                | - | - | - | - | - | + |
| <i>Holopedium gibberum</i> Zaddach, 1855                            | - | - | - | - | - | + |
| <i>Kellicottia longispina</i> (Kellicott, 1879)                     | - | - | - | - | - | + |
| <i>Keratella cochlearis</i> (Gosse, 1851)                           | + | + | + | + | + | + |
| <i>Keratella cochlearis</i> f. <i>macracanta</i> (Lauterborn, 1898) | - | - | - | - | - | + |
| <i>Keratella cochlearis</i> f. <i>tecta</i> (Gosse, 1851)           | - | - | - | - | - | + |
| <i>Keratella quadrata</i> (Müller, 1786)                            | + | + | + | + | + | + |
| <i>Lecane luna</i> (Müller, 1776)                                   | - | - | - | - | - | + |
| <i>Lecane lunaris</i> (Ehrenberg, 1832)                             | - | - | - | - | - | + |
| <i>Lepadella acuminata</i> (Ehrenberg, 1834)                        | + | - | + | + | - | - |
| <i>Lepadella ovalis</i> (Müller, 1786)                              | - | - | - | - | - | + |
| <i>Notholca acuminata</i> (Ehrenberg, 1832)                         | - | - | + | + | + | + |
| <i>Notholca squamula</i> (Müller, 1786)                             | - | - | - | - | - | + |
| <i>Platyias quadricornis</i> (Ehrenberg, 1832)                      | - | - | - | - | - | + |
| <i>Polyarthra dolichoptera</i> Idelson, 1925                        | - | - | + | + | - | + |
| <i>Polyarthra major</i> Burckhard, 1900                             | - | - | - | - | + | + |
| <i>Polyarthra minor</i> Voigt, 1904                                 | - | - | - | - | - | + |
| <i>Polyarthra remata</i> Skorikov, 1896                             | - | - | - | - | - | + |
| <i>Polyarthra vulgaris</i> Carlin, 1943                             | - | - | - | - | + | - |
| <i>Squatinella mutica</i> (Ehrenberg, 1832)                         | - | - | - | - | + | - |
| <i>Synchaeta oblonga</i> Ehrenberg, 1832                            | - | - | - | - | - | + |
| <i>Synchaeta pectinata</i> Ehrenberg, 1832                          | - | - | + | + | - | - |
| <i>Synchaeta stylata</i> Wierzejski, 1893                           | - | - | - | - | - | + |
| <i>Synchaeta tremula</i> (Müller, 1786)                             | - | - | - | - | - | + |
| <i>Testudinella patina</i> (Hermann, 1783)                          | - | - | - | - | + | + |
| <i>Trichocerca capucina</i> (Wierzejski & Zacharias, 1893)          | - | + | + | + | - | + |
| <i>Trichocerca cylindrica</i> (Imhof, 1891)                         | - | - | + | + | + | + |
| <i>Trichocerca elongata</i> (Gosse, 1886)                           | - | - | - | - | - | + |
| <i>Trichotria truncata</i> (Whitelegge, 1889)                       | - | - | - | - | - | + |

\*(*Cyclops furcifer* Claus, 1857 in Liljeblad J (2019). Dyntaxa. Svensk taxonomisk databas. Version 1.2. ArtDatabanken. Checklist dataset <https://doi.org/10.15468/j43wfc> accessed via GBIF.org on 2019-10-14.)
